# Supplementary material
Source: MDPI journal article supplement (https://www.mdpi.com/2073-4395/13/5/1307)
Supplement: s1 [file s1 › Supplementary Materials Figure S1.pdf]

1    Figure

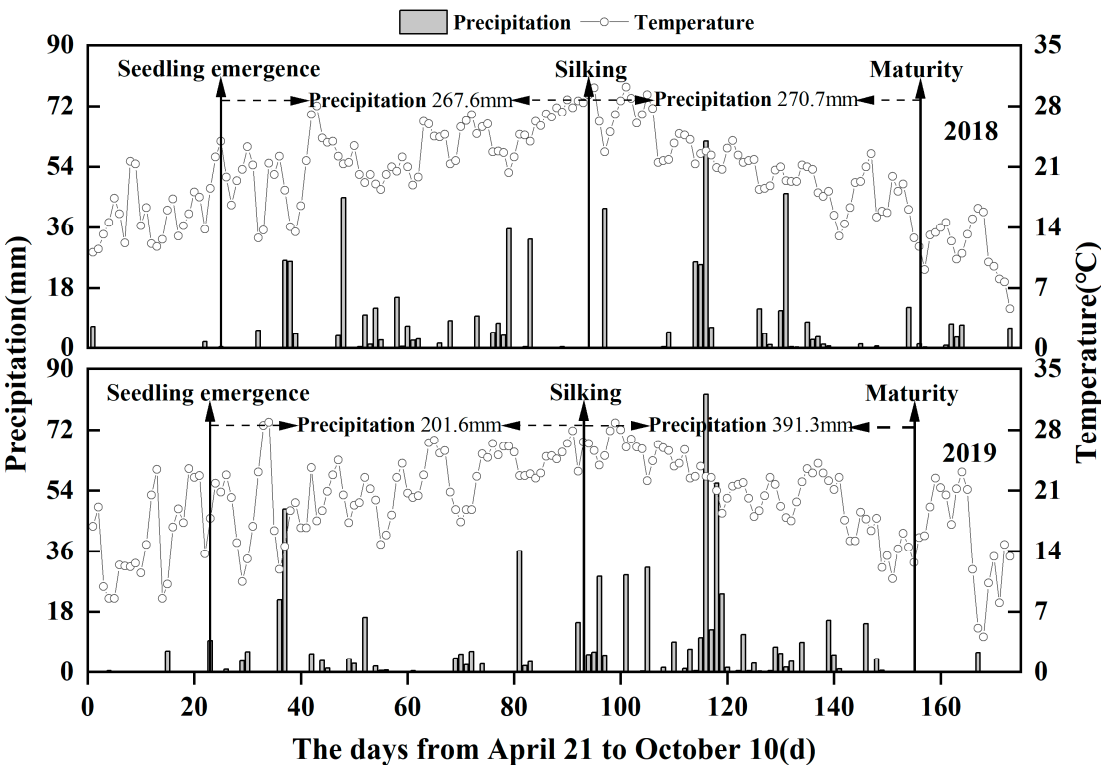

2

3    Figure S1. Precipitation and mean temperature during the growing seasons for maize.VE = emergence,  
4    R1 = silking, R6 = physiological maturity.
