# Supplementary material
Source: MDPI journal article supplement (https://www.mdpi.com/2073-4395/13/5/1307)
Supplement: s1 [file s1 › Supplementary Materials Table S1.pdf]

**Table S1.** Variance analysis of leaf source characteristics of spring maize under different cultivation patterns (F value)

| Treatment     | LAI    |          | Pn        |          | LAD     |          |
|---------------|--------|----------|-----------|----------|---------|----------|
|               | R1     | R6       | R1        | R6       | VE-R1   | R1-R6    |
| ANOVA Year(Y) | 9.98** | 33.43*** | 175.32*** | 37.21*** | 16.47** | 21.17*** |
| Planting (P)  | ns     | 56.87*** | 10.12**   | ns       | ns      | 12.71**  |
| N depth (D)   | ns     | 39.69*** | 12.12**   | 11.89**  | ns      | ns       |
| P×D           | ns     | 7.49*    | ns        | ns       | ns      | ns       |
| Y×P×D         | ns     | ns       | ns        | ns       | ns      | ns       |

\*  $p < 0.05$ , \*\*  $p < 0.01$ , \*\*\*  $p < 0.001$ . NS, no significance. LAI = leaf area index; Pn = net photosynthetic rate; LAD = leaf area duration. VE = emergence; R1 = silking; R6 = maturity.
