# Supplementary material
Source: MDPI journal article supplement (https://www.mdpi.com/2073-4395/13/5/1307)
Supplement: s1 [file s1 › Supplementary Materials Table S2.pdf]

**Table S2.** Variance analysis of soil properties after harvest under different cultivation patterns (F value)

| Treatment     | BD | PH        | SWC | TN       | NH <sub>4</sub> <sup>+</sup> -N | NO <sub>3</sub> <sup>-</sup> -N | TC | AP        | AK       |
|---------------|----|-----------|-----|----------|---------------------------------|---------------------------------|----|-----------|----------|
| ANOVA Year(Y) | ns | ns        | ns  | 76.96*** | 17.41***                        | 27.62***                        | ns | 9.38**    | ns       |
| Planting (P)  | ns | 49.16***  | ns  | 22.43*** | ns                              | 323.43***                       | ns | 170.06*** | 76.26*** |
| N depth (D)   | ns | 100.02*** | ns  | ns       | 21.35***                        | 142.82***                       | ns | 343.47*** | 15.75*** |
| P×D           | ns | 7.39*     | ns  | 7.17*    | ns                              | 76.23***                        | ns | 10.82**   | ns       |
| Y×P×D         | ns | ns        | ns  | ns       | ns                              | 22.94***                        | ns | 6.39**    | 4.27*    |

\* p < 0.05, \*\* p < 0.01, \*\*\* p < 0.001. NS, no significance. BD = bulk density; SWC = soil water content; pH = pH value; TN = total nitrogen; NH<sub>4</sub><sup>+</sup>-N = ammonium nitrogen; NO<sub>3</sub><sup>-</sup>-N = nitrate nitrogen; TC = total carbon; AP = available phosphorus; AK = available potassium.
